# Supplementary material for: A therapeutic approach to pantothenate kinase associated neurodegeneration
Source: PubMed Central journal article supplement (PMC6199309; doi:10.1038/s41467-018-06703-2), 2018-10-23

**Supplementary Dataset 1. Data supporting graphics presented in Supplementary Figure 7.** The first Kinome screen yielded three hits (first DiscoverX primary screen report). These three hits were followed up in a second series of experiments and found to be false positives (second DiscoverX report).

## KINOMEScan™ Profiling Service Primary Screen Report

| Compound Name | Screening Conc (nM) |
|---------------|---------------------|
| PZ-2891       | 10000               |

Requester: Lalit K Sharma, Ph.D.

Company: St Jude Childrens Research Hospital (Sharma)

Study Date: 10/11/2016

Report Date: 10/13/2016

Quote ID: MAXXP08486A

Order ID: SMA001-01-p-00001

Product: scanMAX

Number of Targets Tested: 468

Compounds Screened: 1



Jeremy Hunt  
Director of Screening  
[jhunt@discoverx.com](mailto:jhunt@discoverx.com)  
(858) 224-6927 office  
(858) 630-4600 fax

LeadHunter™ Discovery Services  
DiscoverX Corporation  
42501 Albrae Street  
Fremont, CA 94538-3142  
[services.discoverx.com](http://services.discoverx.com)

## Technology Overview

The KINOMEscan™ screening platform employs a novel and proprietary active site-directed competition binding assay to quantitatively measure interactions between test compounds and more than 450 human kinases and disease relevant mutant variants. This robust and reliable assay technology affords investigators the ability to extensively annotate compounds with accurate, precise and reproducible data. KINOMEscan™ assays do not require ATP and thereby report true thermodynamic interaction affinities, as opposed to IC50 values, which can depend on the ATP concentration.

## How KINOMEscan™ Works

Compounds that bind the kinase active site and directly (sterically) or indirectly (allosterically) prevent kinase binding to the immobilized ligand, will reduce the amount of kinase captured on the solid support (A & B). Conversely, test molecules that do not bind the kinase have no effect on the amount of kinase captured on the solid support (C). Screening "hits" are identified by measuring the amount of kinase captured in test versus control samples by using a quantitative, precise and ultra-sensitive qPCR method that detects the associated DNA label (D). In a similar manner, dissociation constants (Kds) for test compound-kinase interactions are calculated by measuring the amount of kinase captured on the solid support as a function of the test compound concentration.

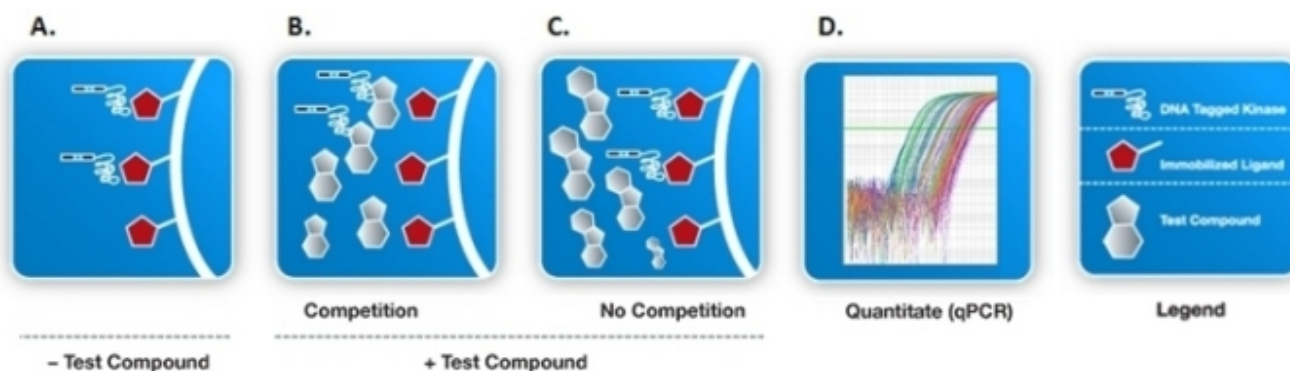

## Protocol Description

**Kinase assays.** For most assays, kinase-tagged T7 phage strains were grown in parallel in 24-well blocks in an *E. coli* host derived from the BL21 strain. *E. coli* were grown to log-phase and infected with T7 phage from a frozen stock (multiplicity of infection = 0.4) and incubated with shaking at 32°C until lysis (90-150 minutes). The lysates were centrifuged (6,000 x g) and filtered (0.2µm) to remove cell debris. The remaining kinases were produced in HEK-293 cells and subsequently tagged with DNA for qPCR detection. Streptavidin-coated magnetic beads were treated with biotinylated small molecule ligands for 30 minutes at room temperature to generate affinity resins for kinase assays. The liganded beads were blocked with excess biotin and washed with blocking buffer (SeaBlock (Pierce), 1 % BSA, 0.05 % Tween 20, 1 mM DTT) to remove unbound ligand and to reduce non-specific phage binding. Binding reactions were assembled by combining kinases, liganded affinity beads, and test compounds in 1x binding buffer (20 % SeaBlock, 0.17x PBS, 0.05 % Tween 20, 6 mM DTT). Test compounds were prepared as 40x stocks in 100% DMSO and directly diluted into the assay. All reactions were performed in polypropylene 384-well plates in a final volume of 0.02 ml. The assay plates were incubated at room temperature with shaking for 1 hour and the affinity beads were washed with wash buffer (1x PBS, 0.05 % Tween 20). The beads were then re-suspended in elution buffer (1x PBS, 0.05 % Tween 20, 0.5 µM non-biotinylated affinity ligand) and incubated at room temperature with shaking for 30 minutes. The kinase concentration in the eluates was measured by qPCR.

## Percent Control (%Ctrl)

The compound(s) were screened at the concentration(s) requested, and results for primary screen binding interactions are reported as '% Ctrl', where lower numbers indicate stronger hits in the matrix on the following page(s).

### %Ctrl Calculation

$$\left[ \frac{\text{test compound signal} - \text{positive control signal}}{\text{negative control signal} - \text{positive control signal}} \right] \times 100$$

*test compound* = compound submitted by St Jude Childrens Research Hospital (Sharma)

*negative control* = DMSO (100%Ctrl)

*positive control* = control compound (0%Ctrl)

### Relationship between Binding Constant Distributions (Kds) & Single Concentration Primary Screen Values

Based on screening data from thousands of profiled compounds, a proportional relationship between primary screening results and corresponding compound/target affinities may be described. Evident in the correlation graph below is a range of binding constants (Kd values) for the indicated ranges of POC values with tighter binding (higher affinity) interactions associated with lower POC values and weaker binding (lower affinity) associated with higher POC values. This distribution of binding constants is characteristic of single concentration primary screens and underscores the importance of following up observed 'hits' or apparent high affinity interactions with quantitative binding constant determinations.

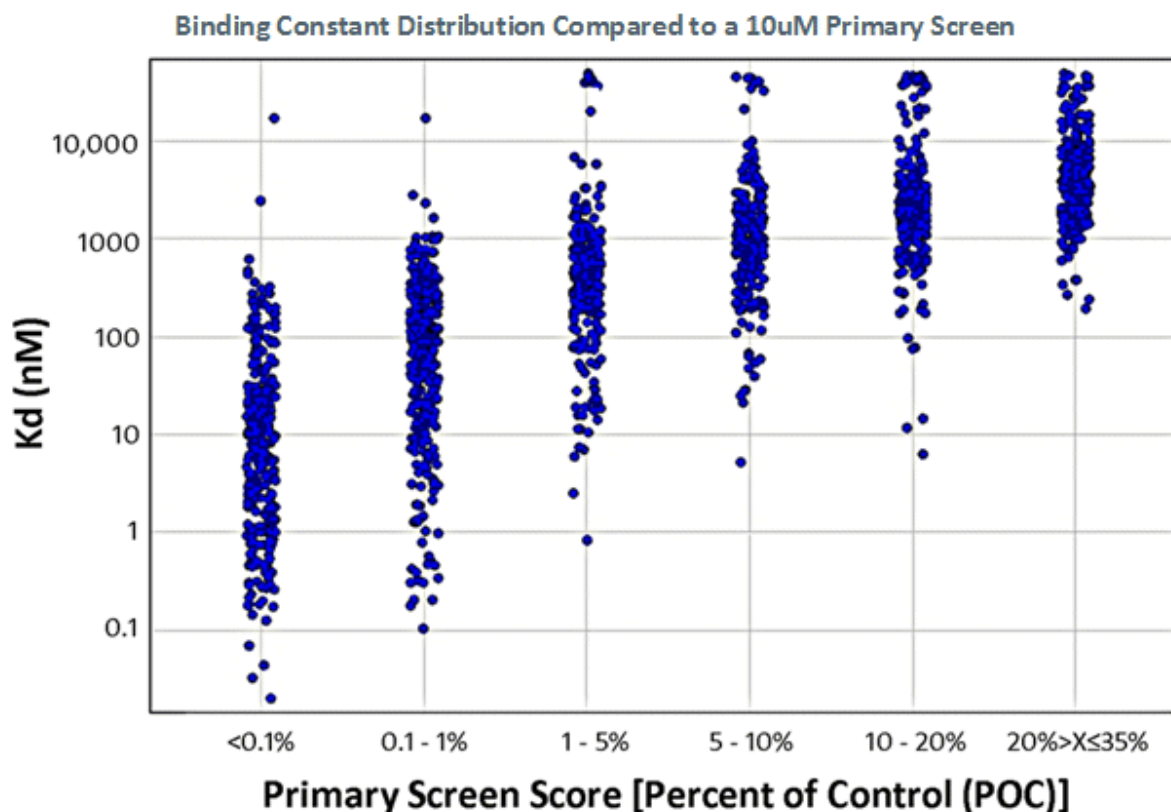

*Data correlation between primary screening (10µM concentration) and binding constants (Kd values). Binding constants are correlated with primary screening results, where lower POC values are associated with low Kd values (higher affinity interactions).*

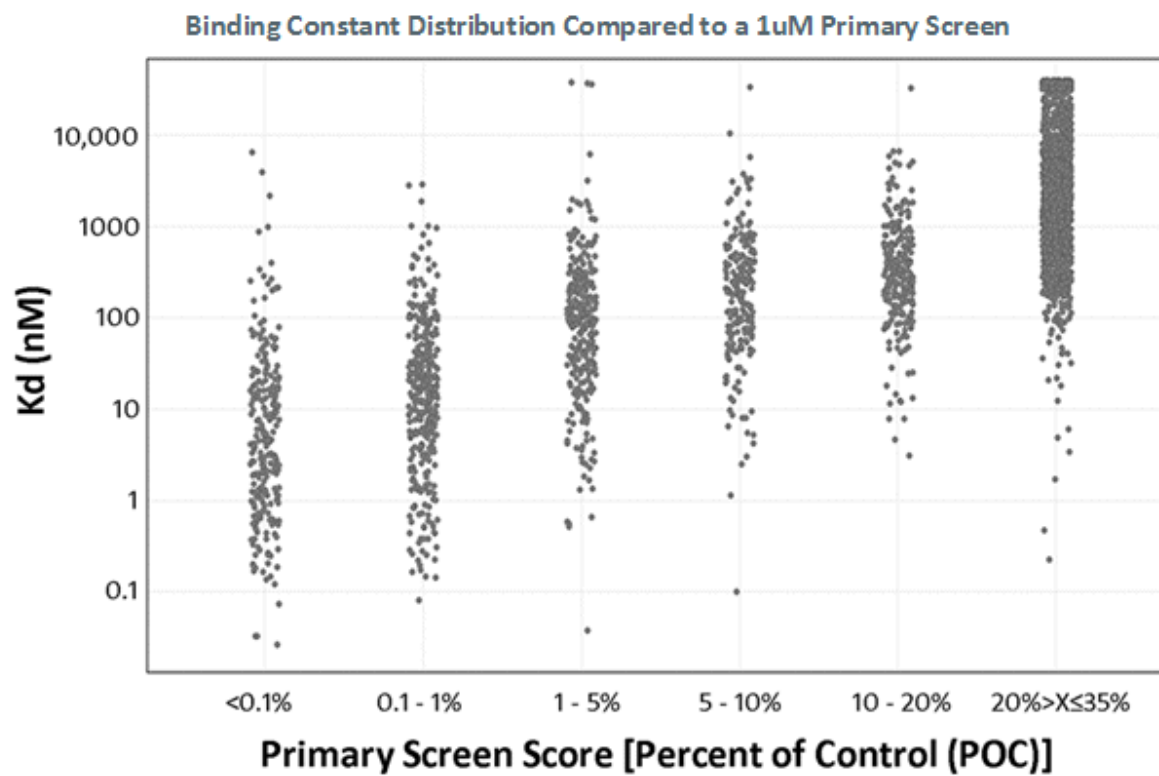

Data correlation between primary screening (1 $\mu$ M concentration) and binding constants (Kd values). Binding constants are correlated with primary screening results, where lower POC values are associated with low Kd values (higher affinity interactions).

## Selectivity Score (S-scores)

Selectivity Score or S-score is a quantitative measure of compound selectivity. It is calculated by dividing the number of kinases that compounds bind to by the total number of distinct kinases tested, excluding mutant variants.

$$S = \text{Number of hits} / \text{Number of assays}$$

This value can be calculated using %Ctrl as a potency threshold (below) and provides a quantitative method of describing compound selectivity to facilitate comparison of different compounds.

$$S(35) = (\text{number of non-mutant kinases with \%Ctrl} < 35) / (\text{number of non-mutant kinases tested})$$

$$S(10) = (\text{number of non-mutant kinases with \%Ctrl} < 10) / (\text{number of non-mutant kinases tested})$$

$$S(1) = (\text{number of non-mutant kinases with \%Ctrl} < 1) / (\text{number of non-mutant kinases tested})$$

## Using S-Score Data to Quantitate Selectivity

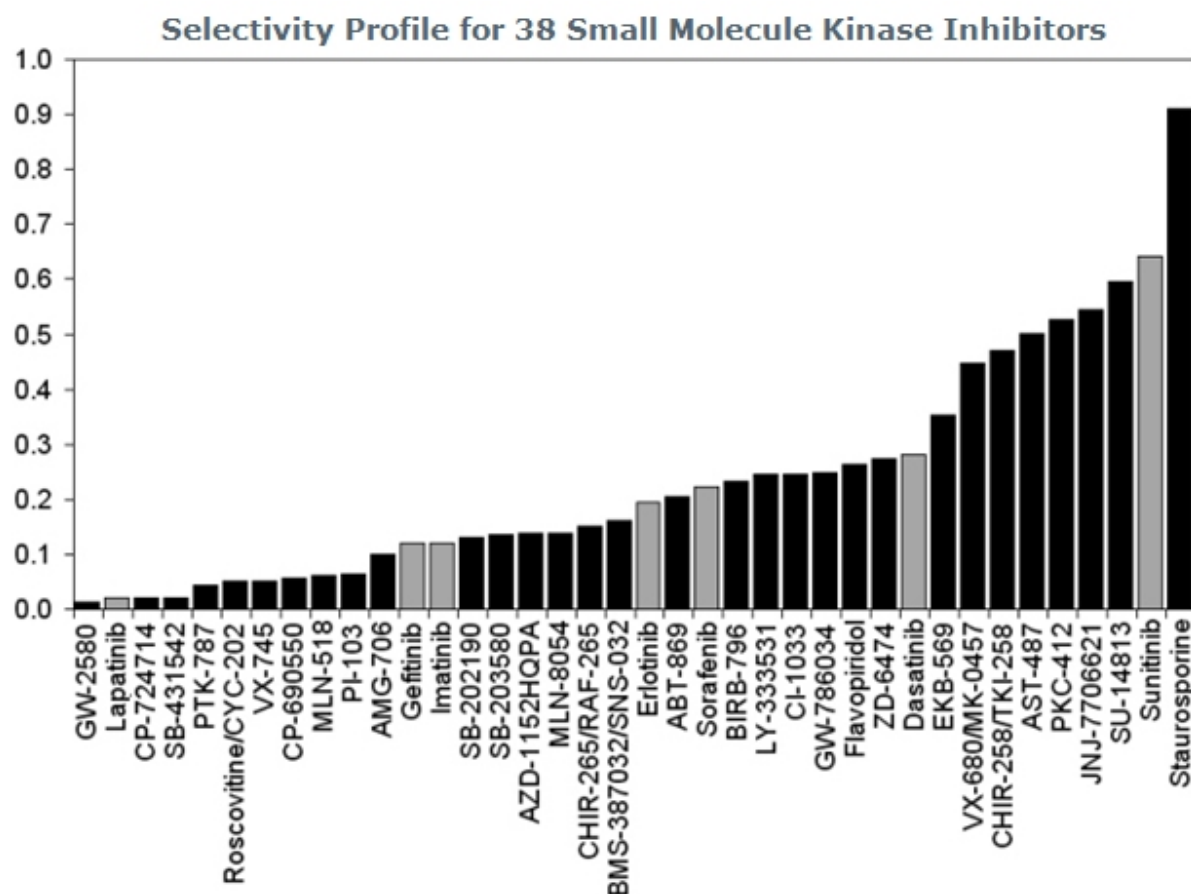

KINOMEScan's *in vitro* competition binding assay was used to evaluate 38 kinase inhibitors against a panel of 287 distinct human protein kinases (~55% of the predicted human protein kinome), and three lipid kinases. The compounds tested included 21 tyrosine kinase inhibitors, 15 serine-threonine kinase inhibitors, 1 lipid kinase inhibitor and staurosporine.  $S(35) = (\text{number of non-mutant kinases with \%Ctrl} < 35) / (290 \text{ kinases tested}; 27 \text{ mutant variants were excluded from this analysis})$ . Compounds approved for use in humans (as of August, 2007) are highlighted (gray bars).

## References

KINOMEScan™ and BROMOScan™ use the same assay technology. For a more detailed description of this assay technology, see:

- Fabian, M.A. *et al.* A small molecule-kinase interaction map for clinical kinase inhibitors. *Nat. Biotechnol.* 23, 329-336 (2005).

To view kinase interaction maps for 38 well-known kinase inhibitors and a more detailed discussion of selectivity scores, see:

- Karaman, M.W. *et al.* A quantitative analysis of kinase inhibitor selectivity. *Nat. Biotechnol.* 26, 127-132 (2008).

Select publications are available at [www.discoverx.com](http://www.discoverx.com).

SMA001-01-p-00001 Study Results

Table 1 - Matrix of Compound Screen for SMA001-01-p-00001

| Target                        | PZ-2891         |
|-------------------------------|-----------------|
| Gene Symbol                   | %Ctrl @ 10000nM |
| AAK1                          | 84              |
| ABL1(E255K)-phosphorylated    | 53              |
| ABL1(F317I)-nonphosphorylated | 77              |
| ABL1(F317I)-phosphorylated    | 89              |
| ABL1(F317L)-nonphosphorylated | 73              |
| ABL1(F317L)-phosphorylated    | 100             |
| ABL1(H396P)-nonphosphorylated | 74              |
| ABL1(H396P)-phosphorylated    | 76              |
| ABL1(M351T)-phosphorylated    | 96              |
| ABL1(Q252H)-nonphosphorylated | 97              |
| ABL1(Q252H)-phosphorylated    | 74              |
| ABL1(T315I)-nonphosphorylated | 63              |
| ABL1(T315I)-phosphorylated    | 97              |
| ABL1(Y253F)-phosphorylated    | 82              |
| ABL1-nonphosphorylated        | 65              |
| ABL1-phosphorylated           | 78              |
| ABL2                          | 96              |
| ACVR1                         | 88              |
| ACVR1B                        | 97              |
| ACVR2A                        | 100             |
| ACVR2B                        | 100             |
| ACVRL1                        | 100             |
| ADCK3                         | 100             |
| ADCK4                         | 92              |
| AKT1                          | 98              |
| AKT2                          | 85              |
| AKT3                          | 82              |
| ALK                           | 100             |
| ALK(C1156Y)                   | 74              |
| ALK(L1196M)                   | 73              |
| AMPK-alpha1                   | 92              |
| AMPK-alpha2                   | 100             |
| ANKK1                         | 78              |
| ARK5                          | 94              |
| ASK1                          | 74              |
| ASK2                          | 83              |
| AURKA                         | 75              |
| AURKB                         | 89              |
| AURKC                         | 94              |
| AXL                           | 73              |
| BIKE                          | 100             |
| BLK                           | 87              |
| BMPR1A                        | 100             |
| BMPR1B                        | 60              |
| BMPR2                         | 87              |
| BMX                           | 100             |
| BRAF                          | 100             |
| BRAF(V600E)                   | 100             |

Table 1 - Assay Matrix (continued).

| Target              | PZ-2891        |
|---------------------|----------------|
| Gene Symbol         | %Ctrl @ 1000nM |
| BRK                 | 80             |
| BRSK1               | 75             |
| BRSK2               | 81             |
| BTK                 | 94             |
| BUB1                | 100            |
| CAMK1               | 93             |
| CAMK1B              | 100            |
| CAMK1D              | 95             |
| CAMK1G              | 83             |
| CAMK2A              | 98             |
| CAMK2B              | 88             |
| CAMK2D              | 91             |
| CAMK2G              | 86             |
| CAMK4               | 89             |
| CAMKK1              | 89             |
| CAMKK2              | 87             |
| CASK                | 85             |
| CDC2L1              | 95             |
| CDC2L2              | 87             |
| CDC2L5              | 81             |
| CDK11               | 78             |
| CDK2                | 87             |
| CDK3                | 97             |
| CDK4                | 99             |
| CDK4-cyclinD1       | 100            |
| CDK4-cyclinD3       | 71             |
| CDK5                | 87             |
| CDK7                | 79             |
| CDK8                | 83             |
| CDK9                | 98             |
| CDKL1               | 74             |
| CDKL2               | 90             |
| CDKL3               | 86             |
| CDKL5               | 67             |
| CHEK1               | 83             |
| CHEK2               | 79             |
| CIT                 | 97             |
| CLK1                | 75             |
| CLK2                | 94             |
| CLK3                | 93             |
| CLK4                | 98             |
| CSF1R               | 91             |
| CSF1R-autoinhibited | 93             |
| CSK                 | 97             |
| CSNK1A1             | 66             |
| CSNK1A1L            | 100            |
| CSNK1D              | 93             |
| CSNK1E              | 97             |
| CSNK1G1             | 92             |



Table 1 - Assay Matrix (continued).

| Target                    | PZ-2891        |
|---------------------------|----------------|
| Gene Symbol               | %Ctrl @ 1000nM |
| CSNK1G2                   | 62             |
| CSNK1G3                   | 80             |
| CSNK2A1                   | 82             |
| CSNK2A2                   | 88             |
| CTK                       | 77             |
| DAPK1                     | 63             |
| DAPK2                     | 95             |
| DAPK3                     | 100            |
| DCAMKL1                   | 80             |
| DCAMKL2                   | 89             |
| DCAMKL3                   | 84             |
| DDR1                      | 81             |
| DDR2                      | 85             |
| DLK                       | 100            |
| DMPK                      | 89             |
| DMPK2                     | 93             |
| DRAK1                     | 99             |
| DRAK2                     | 95             |
| DYRK1A                    | 71             |
| DYRK1B                    | 66             |
| DYRK2                     | 97             |
| EGFR                      | 78             |
| EGFR(E746-A750del)        | 100            |
| EGFR(G719C)               | 100            |
| EGFR(G719S)               | 91             |
| EGFR(L747-E749del, A750P) | 72             |
| EGFR(L747-S752del, P753S) | 100            |
| EGFR(L747-T751del,Sins)   | 100            |
| EGFR(L858R)               | 84             |
| EGFR(L858R,T790M)         | 98             |
| EGFR(L861Q)               | 100            |
| EGFR(S752-I759del)        | 100            |
| EGFR(T790M)               | 78             |
| EIF2AK1                   | 95             |
| EPHA1                     | 95             |
| EPHA2                     | 100            |
| EPHA3                     | 65             |
| EPHA4                     | 93             |
| EPHA5                     | 88             |
| EPHA6                     | 89             |
| EPHA7                     | 92             |
| EPHA8                     | 95             |
| EPHB1                     | 90             |
| EPHB2                     | 82             |
| EPHB3                     | 92             |
| EPHB4                     | 97             |
| EPHB6                     | 68             |
| ERBB2                     | 92             |
| ERBB3                     | 60             |

Table 1 - Assay Matrix (continued).

| Target                | PZ-2891        |
|-----------------------|----------------|
| Gene Symbol           | %Ctrl @ 1000nM |
| ERBB4                 | 100            |
| ERK1                  | 91             |
| ERK2                  | 86             |
| ERK3                  | 97             |
| ERK4                  | 97             |
| ERK5                  | 93             |
| ERK8                  | 81             |
| ERN1                  | 82             |
| FAK                   | 89             |
| FER                   | 88             |
| FES                   | 94             |
| FGFR1                 | 87             |
| FGFR2                 | 100            |
| FGFR3                 | 96             |
| FGFR3(G697C)          | 99             |
| FGFR4                 | 73             |
| FGR                   | 96             |
| FLT1                  | 100            |
| FLT3                  | 57             |
| FLT3(D835H)           | 92             |
| FLT3(D835V)           | 78             |
| FLT3(D835Y)           | 89             |
| FLT3(ITD)             | 99             |
| FLT3(ITD,D835V)       | 85             |
| FLT3(ITD,F691L)       | 76             |
| FLT3(K663Q)           | 88             |
| FLT3(N841I)           | 86             |
| FLT3(R834Q)           | 100            |
| FLT3-autoinhibited    | 82             |
| FLT4                  | 91             |
| FRK                   | 86             |
| FYN                   | 87             |
| GAK                   | 93             |
| GCN2(Kin.Dom.2,S808G) | 87             |
| GRK1                  | 72             |
| GRK2                  | 56             |
| GRK3                  | 35             |
| GRK4                  | 52             |
| GRK7                  | 93             |
| GSK3A                 | 83             |
| GSK3B                 | 74             |
| HASPIN                | 85             |
| HCK                   | 79             |
| HIPK1                 | 61             |
| HIPK2                 | 100            |
| HIPK3                 | 81             |
| HIPK4                 | 94             |
| HPK1                  | 100            |
| HUNK                  | 100            |

Table 1 - Assay Matrix (continued).

| Target                       | PZ-2891        |
|------------------------------|----------------|
| Gene Symbol                  | %Ctrl @ 1000nM |
| ICK                          | 81             |
| IGF1R                        | 91             |
| IKK-alpha                    | 100            |
| IKK-beta                     | 100            |
| IKK-epsilon                  | 89             |
| INSR                         | 84             |
| INSRR                        | 82             |
| IRAK1                        | 91             |
| IRAK3                        | 42             |
| IRAK4                        | 93             |
| ITK                          | 89             |
| JAK1(JH1domain-catalytic)    | 74             |
| JAK1(JH2domain-pseudokinase) | 47             |
| JAK2(JH1domain-catalytic)    | 88             |
| JAK3(JH1domain-catalytic)    | 94             |
| JNK1                         | 62             |
| JNK2                         | 79             |
| JNK3                         | 88             |
| KIT                          | 75             |
| KIT(A829P)                   | 91             |
| KIT(D816H)                   | 66             |
| KIT(D816V)                   | 92             |
| KIT(L576P)                   | 88             |
| KIT(V559D)                   | 81             |
| KIT(V559D,T670I)             | 94             |
| KIT(V559D,V654A)             | 73             |
| KIT-autoinhibited            | 81             |
| LATS1                        | 86             |
| LATS2                        | 82             |
| LCK                          | 98             |
| LIMK1                        | 87             |
| LIMK2                        | 95             |
| LKB1                         | 93             |
| LOK                          | 86             |
| LRRK2                        | 100            |
| LRRK2(G2019S)                | 100            |
| LTK                          | 75             |
| LYN                          | 79             |
| LZK                          | 89             |
| MAK                          | 69             |
| MAP3K1                       | 89             |
| MAP3K15                      | 92             |
| MAP3K2                       | 96             |
| MAP3K3                       | 65             |
| MAP3K4                       | 93             |
| MAP4K2                       | 77             |
| MAP4K3                       | 94             |
| MAP4K4                       | 100            |
| MAP4K5                       | 100            |

Table 1 - Assay Matrix (continued).

| Target      | PZ-2891        |
|-------------|----------------|
| Gene Symbol | %Ctrl @ 1000nM |
| MAPKAPK2    | 88             |
| MAPKAPK5    | 74             |
| MARK1       | 77             |
| MARK2       | 70             |
| MARK3       | 84             |
| MARK4       | 81             |
| MAST1       | 61             |
| MEK1        | 76             |
| MEK2        | 80             |
| MEK3        | 61             |
| MEK4        | 100            |
| MEK5        | 69             |
| MEK6        | 94             |
| MELK        | 75             |
| MERTK       | 95             |
| MET         | 80             |
| MET(M1250T) | 98             |
| MET(Y1235D) | 66             |
| MINK        | 74             |
| MKK7        | 84             |
| MKNK1       | 97             |
| MKNK2       | 79             |
| MLCK        | 100            |
| MLK1        | 81             |
| MLK2        | 72             |
| MLK3        | 80             |
| MRCKA       | 92             |
| MRCKB       | 100            |
| MST1        | 86             |
| MST1R       | 73             |
| MST2        | 92             |
| MST3        | 73             |
| MST4        | 91             |
| MTOR        | 68             |
| MUSK        | 95             |
| MYLK        | 75             |
| MYLK2       | 98             |
| MYLK4       | 92             |
| MYO3A       | 68             |
| MYO3B       | 88             |
| NDR1        | 75             |
| NDR2        | 94             |
| NEK1        | 100            |
| NEK10       | 89             |
| NEK11       | 99             |
| NEK2        | 88             |
| NEK3        | 69             |
| NEK4        | 95             |
| NEK5        | 100            |

Table 1 - Assay Matrix (continued).

| Target                | PZ-2891        |
|-----------------------|----------------|
| Gene Symbol           | %Ctrl @ 1000nM |
| NEK6                  | 91             |
| NEK7                  | 75             |
| NEK9                  | 96             |
| NIK                   | 100            |
| NIM1                  | 83             |
| NLK                   | 94             |
| OSR1                  | 87             |
| p38-alpha             | 100            |
| p38-beta              | 96             |
| p38-delta             | 76             |
| p38-gamma             | 58             |
| PAK1                  | 76             |
| PAK2                  | 44             |
| PAK3                  | 88             |
| PAK4                  | 92             |
| PAK6                  | 100            |
| PAK7                  | 73             |
| PCK1                  | 76             |
| PCK2                  | 95             |
| PCK3                  | 92             |
| PDGFRA                | 70             |
| PDGFRB                | 75             |
| PDPK1                 | 75             |
| PFCDPK1(P.falciparum) | 97             |
| PFPK5(P.falciparum)   | 99             |
| PFTAIRE2              | 99             |
| PFTK1                 | 92             |
| PHKG1                 | 88             |
| PHKG2                 | 100            |
| PIK3C2B               | 100            |
| PIK3C2G               | 61             |
| PIK3CA                | 95             |
| PIK3CA(C420R)         | 76             |
| PIK3CA(E542K)         | 64             |
| PIK3CA(E545A)         | 64             |
| PIK3CA(E545K)         | 65             |
| PIK3CA(H1047L)        | 69             |
| PIK3CA(H1047Y)        | 46             |
| PIK3CA(I800L)         | 42             |
| PIK3CA(M1043I)        | 74             |
| PIK3CA(Q546K)         | 70             |
| PIK3CB                | 65             |
| PIK3CD                | 89             |
| PIK3CG                | 96             |
| PIK4CB                | 84             |
| PIKFYVE               | 72             |
| PIM1                  | 93             |
| PIM2                  | 96             |
| PIM3                  | 58             |

Table 1 - Assay Matrix (continued).

| Target                        | PZ-2891        |
|-------------------------------|----------------|
| Gene Symbol                   | %Ctrl @ 1000nM |
| PIP5K1A                       | 86             |
| PIP5K1C                       | 100            |
| PIP5K2B                       | 88             |
| PIP5K2C                       | 85             |
| PKAC-alpha                    | 87             |
| PKAC-beta                     | 95             |
| PKMYT1                        | 100            |
| PKN1                          | 69             |
| PKN2                          | 94             |
| PKNB(M.tuberculosis)          | 74             |
| PLK1                          | 85             |
| PLK2                          | 84             |
| PLK3                          | 78             |
| PLK4                          | 88             |
| PRKCD                         | 89             |
| PRKCE                         | 70             |
| PRKCH                         | 92             |
| PRKCI                         | 83             |
| PRKCO                         | 100            |
| PRKD1                         | 89             |
| PRKD2                         | 82             |
| PRKD3                         | 66             |
| PRKG1                         | 99             |
| PRKG2                         | 76             |
| PRKR                          | 100            |
| PRKX                          | 70             |
| PRP4                          | 86             |
| PYK2                          | 90             |
| QSK                           | 82             |
| RAF1                          | 85             |
| RET                           | 74             |
| RET(M918T)                    | 95             |
| RET(V804L)                    | 96             |
| RET(V804M)                    | 95             |
| RIOK1                         | 100            |
| RIOK2                         | 86             |
| RIOK3                         | 100            |
| RIPK1                         | 98             |
| RIPK2                         | 89             |
| RIPK4                         | 81             |
| RIPK5                         | 77             |
| ROCK1                         | 100            |
| ROCK2                         | 100            |
| ROS1                          | 81             |
| RPS6KA4(Kin.Dom.1-N-terminal) | 96             |
| RPS6KA4(Kin.Dom.2-C-terminal) | 67             |
| RPS6KA5(Kin.Dom.1-N-terminal) | 93             |
| RPS6KA5(Kin.Dom.2-C-terminal) | 96             |
| RSK1(Kin.Dom.1-N-terminal)    | 100            |

Table 1 - Assay Matrix (continued).

| Target                     | PZ-2891         |
|----------------------------|-----------------|
| Gene Symbol                | %Ctrl @ 10000nM |
| RSK1(Kin.Dom.2-C-terminal) | 64              |
| RSK2(Kin.Dom.1-N-terminal) | 80              |
| RSK2(Kin.Dom.2-C-terminal) | 89              |
| RSK3(Kin.Dom.1-N-terminal) | 72              |
| RSK3(Kin.Dom.2-C-terminal) | 66              |
| RSK4(Kin.Dom.1-N-terminal) | 97              |
| RSK4(Kin.Dom.2-C-terminal) | 71              |
| S6K1                       | 96              |
| SBK1                       | 62              |
| SGK                        | 61              |
| SgK110                     | 94              |
| SGK2                       | 64              |
| SGK3                       | 71              |
| SIK                        | 83              |
| SIK2                       | 9.5             |
| SLK                        | 93              |
| SNARK                      | 69              |
| SNRK                       | 85              |
| SRC                        | 97              |
| SRMS                       | 72              |
| SRPK1                      | 100             |
| SRPK2                      | 97              |
| SRPK3                      | 67              |
| STK16                      | 98              |
| STK33                      | 90              |
| STK35                      | 0.2             |
| STK36                      | 84              |
| STK39                      | 70              |
| SYK                        | 82              |
| TAK1                       | 67              |
| TAOK1                      | 93              |
| TAOK2                      | 99              |
| TAOK3                      | 95              |
| TBK1                       | 60              |
| TEC                        | 79              |
| TESK1                      | 86              |
| TGFBR1                     | 99              |
| TGFBR2                     | 98              |
| TIE1                       | 85              |
| TIE2                       | 97              |
| TLK1                       | 72              |
| TLK2                       | 98              |
| TNIK                       | 91              |
| TNK1                       | 100             |
| TNK2                       | 98              |
| TNNI3K                     | 76              |
| TRKA                       | 100             |
| TRKB                       | 100             |
| TRKC                       | 100             |

Table 1 - Assay Matrix (continued).

| Target                       | PZ-2891        |
|------------------------------|----------------|
| Gene Symbol                  | %Ctrl @ 1000nM |
| TRPM6                        | 98             |
| TSSK1B                       | 99             |
| TSSK3                        | 69             |
| TTK                          | 96             |
| TXK                          | 92             |
| TYK2(JH1domain-catalytic)    | 67             |
| TYK2(JH2domain-pseudokinase) | 100            |
| TYRO3                        | 100            |
| ULK1                         | 82             |
| ULK2                         | 86             |
| ULK3                         | 89             |
| VEGFR2                       | 75             |
| VPS34                        | 80             |
| VRK2                         | 70             |
| WEE1                         | 92             |
| WEE2                         | 99             |
| WNK1                         | 100            |
| WNK2                         | 87             |
| WNK3                         | 100            |
| WNK4                         | 69             |
| YANK1                        | 74             |
| YANK2                        | 100            |
| YANK3                        | 84             |
| YES                          | 90             |
| YSK1                         | 100            |
| YSK4                         | 89             |
| ZAK                          | 88             |
| ZAP70                        | 96             |

%Ctrl Legend

|                 |                 |                 |                  |             |
|-----------------|-----------------|-----------------|------------------|-------------|
| $0 \leq x < .1$ | $.1 \leq x < 1$ | $1 \leq x < 10$ | $10 \leq x < 35$ | $x \geq 35$ |
|-----------------|-----------------|-----------------|------------------|-------------|



## S-score Results

Table 2 - S-score Table for SMA001-01-p-00001

| Compound Name | Selectivity Score Type | Number of Hits | Number of Non-Mutant Kinases | Screening Concentration (nM) | Selectivity Score |
|---------------|------------------------|----------------|------------------------------|------------------------------|-------------------|
| PZ-2891       | S(35)                  | 2              | 403                          | 10000                        | 0.005             |
| PZ-2891       | S(10)                  | 2              | 403                          | 10000                        | 0.005             |
| PZ-2891       | S(1)                   | 1              | 403                          | 10000                        | 0.002             |

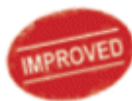

## TREEspot™ Interaction Maps - Now Includes Mutant, Lipid, Atypical & Pathogen Kinase Dendrograms

As part of our ongoing effort to provide customers with the best possible data analysis tools, KINOMEscan™ has developed an enhanced rendering of the human kinase dendrogram and allows, for the first time ever, to fully visualize compound interactions across our industry leading kinase panel, including clinically and biochemically relevant mutants, lipid, atypical, and pathogen kinases, plus a growing panel of activation-state specific assays.

TREEspot™ is an artistic representation of the human kinome phylogenetic tree based on extensive published research. We welcome your comments and feedback on this new visualization image. Please contact us at [sales@kinomescan.com](mailto:sales@kinomescan.com) to tell us what you think.

### Key Changes

- More uniform format and presentation
- Kinase groups more clearly delineated
- Updated nomenclature for kinases

TREEspot™ is a proprietary data visualization software tool developed by KINOMEscan. *Mutant and lipid kinases are not represented.* Kinases found to bind are marked with red circles, where larger circles indicate higher-affinity binding. Visualize data online and create your own high resolution TREEspot™ interaction maps with our easy-to-use compound profile visualization tool. [Instructions and login credentials provided below.](#)

Login: [treespot.discoverx.com](http://treespot.discoverx.com) -- Username: treespot! -- Password: guest037

Instructions: [treespot.discoverx.com/Help/TreeSpotHelpBasic.htm](http://treespot.discoverx.com/Help/TreeSpotHelpBasic.htm)

Table 3 - TREEspot™ Interaction Maps for SMA001-01-p-00001

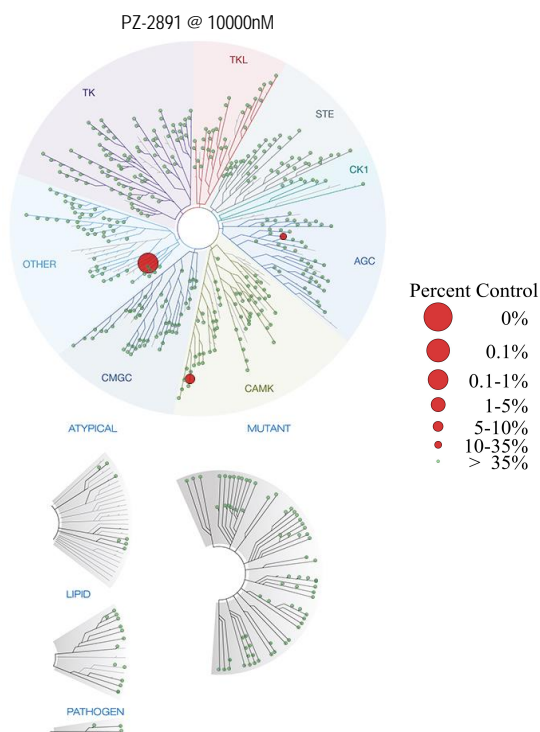

## Available Follow-up Screening Services

LeadHunter™ Discovery Services offers a suite of investigative tools that enable detailed biochemical characterization of the interaction between inhibitors and their targets. The thermodynamic, kinetic, and structural information provided by these tools enables a detailed comparison of inhibitors from common or distinct lead series and facilitates the interpretation of data from downstream cellular and *in vivo* pharmacology models. These services are now available for both kinases and for bromodomain-containing proteins.

---

### ***k<sub>d</sub>*ELECT** Obtain quantitative binding affinities for compound-kinase interactions

**KdELECT™** - a powerful follow up service to quantify binding affinity of compound-kinase interactions identified in primary (single concentration) screens. Inhibitor binding constants (Kd values) are calculated from duplicate 11-point dose-response curves under optimized conditions that generate true thermodynamic Kd values which facilitate direct comparison of inhibitor affinity across kinases. [Learn more >>](#)

---

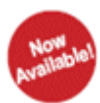

### PathHunter® cell-based compound screening & profiling services

PathHunter inCell assays and screening services are a powerful follow up solution to KINOMEscan™ *in vitro* biochemical studies for obtaining the maximum level of information about inhibitor function, potency and selectivity in a more physiological context.

## KINOMEScan™ Profiling Service Kd Report

Requester: Lalit K Sharma, Ph.D.

Company: St Jude Childrens Research  
Hospital (Sharma)

Study Date: 10/27/2016

Report Date: 10/27/2016

Quote ID: KDELS04303A

Order ID: SMA003-01-s-00001

Product: KdELECT

Number of Kds Determined: 3

| Compound Name | Kds Determined |
|---------------|----------------|
| PZ-2891       | 3              |



Jeremy Hunt  
Director of Screening  
[jhunt@discoverx.com](mailto:jhunt@discoverx.com)  
(858) 224-6927 office  
(858) 630-4600 fax

LeadHunter™ Discovery Services  
DiscoverX Corporation  
42501 Albrae Street  
Fremont, CA 94538-3142  
[services.discoverx.com](http://services.discoverx.com)

## Technology Overview

KINOMEscan™ is the industry's most comprehensive high-throughput system for screening compounds against large numbers of human kinases. Developed by DiscoverX, KINOMEscan™ employs proprietary active-site dependent competition binding assays to determine how compounds bind to both intended and unintended kinases. In addition to helping keep discovery programs on track, KINOMEscan™ can opportunistically identify unanticipated interactions that can expand the therapeutic utility of compounds or serve as advanced starting points for new programs.

## How KINOMEscan™ Works

KINOMEscan™ is based on a competition binding assay that quantitatively measures the ability of a compound to compete with an immobilized, active-site directed ligand. The assay is performed by combining three components: DNA-tagged kinase; immobilized ligand; and a test compound. The ability of the test compound to compete with the immobilized ligand is measured via quantitative PCR of the DNA tag.

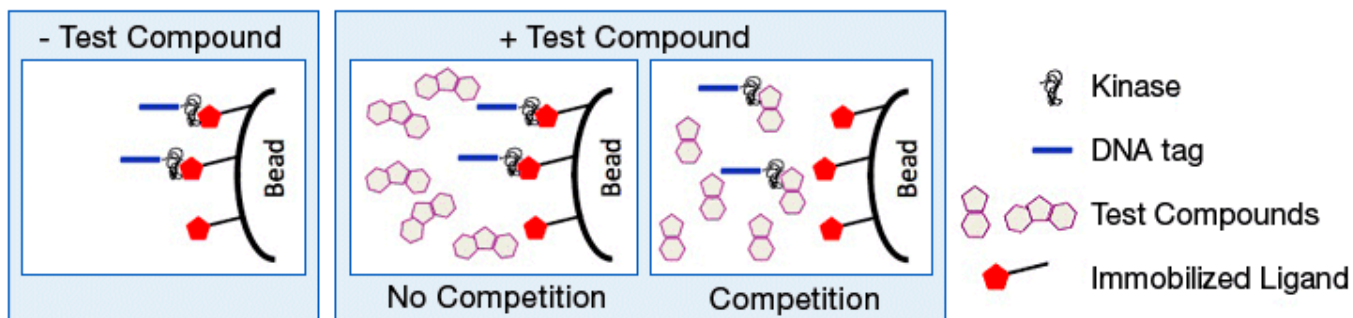

## Protocol Description

Kinase assays. For most assays, kinase-tagged T7 phage strains were prepared in an *E. coli* host derived from the BL21 strain. *E. coli* were grown to log-phase and infected with T7 phage and incubated with shaking at 32°C until lysis. The lysates were centrifuged and filtered to remove cell debris. The remaining kinases were produced in HEK-293 cells and subsequently tagged with DNA for qPCR detection. Streptavidin-coated magnetic beads were treated with biotinylated small molecule ligands for 30 minutes at room temperature to generate affinity resins for kinase assays. The liganded beads were blocked with excess biotin and washed with blocking buffer (SeaBlock (Pierce), 1% BSA, 0.05% Tween 20, 1 mM DTT) to remove unbound ligand and to reduce non-specific binding. Binding reactions were assembled by combining kinases, liganded affinity beads, and test compounds in 1x binding buffer (20% SeaBlock, 0.17x PBS, 0.05% Tween 20, 6 mM DTT). Test compounds were prepared as 111X stocks in 100% DMSO. K<sub>d</sub>s were determined using an 11-point 3-fold compound dilution series with three DMSO control points. All compounds for K<sub>d</sub> measurements are distributed by acoustic transfer (non-contact dispensing) in 100% DMSO. The compounds were then diluted directly into the assays such that the final concentration of DMSO was 0.9%. All reactions performed in polypropylene 384-well plate. Each was a final volume of 0.02 ml. The assay plates were incubated at room temperature with shaking for 1 hour and the affinity beads were washed with wash buffer (1x PBS, 0.05% Tween 20). The beads were then re-suspended in elution buffer (1x PBS, 0.05% Tween 20, 0.5 μM non-biotinylated affinity ligand) and incubated at room temperature with shaking for 30 minutes. The kinase concentration in the eluates was measured by qPCR.

## Compound Handling

An 11-point 3-fold serial dilution of each test compound was prepared in 100% DMSO at 100x final test concentration and subsequently diluted to 1x in the assay (final DMSO concentration = 1%). Most Kds were determined using a compound top concentration = 30,000 nM. If the initial Kd determined was < 0.5 nM (the lowest concentration tested), the measurement was repeated with a serial dilution starting at a lower top concentration. A Kd value reported as 40,000 nM indicates that the Kd was determined to be >30,000 nM.

## Binding Constants (Kds)

Binding constants (Kds) were calculated with a standard dose-response curve using the Hill equation:

$$\text{Response} = \text{Background} + \frac{\text{Signal} - \text{Background}}{1 + (\text{Kd}^{\text{Hill Slope}} / \text{Dose}^{\text{Hill Slope}})}$$

The Hill Slope was set to -1.

Curves were fitted using a non-linear least square fit with the Levenberg-Marquardt algorithm.

## TREEspot™ Compound Profile Visualization Tool

TREEspot™ is a proprietary data visualization software tool developed by KINOMEScan™. Visualize data online and create your own high resolution TREEspot™ interaction maps with our easy-to-use compound profile visualization tool. TREEspot™ is provided as a complimentary service to our clients. To access TREEspot™, please follow these directions:

Login: [treespot.discoverx.com](https://treespot.discoverx.com) -- Username: treespot! -- Password: guest037

Instructions: [treespot.discoverx.com/Help/TreeSpotHelpBasic.htm](https://treespot.discoverx.com/Help/TreeSpotHelpBasic.htm)

## References

KINOMEScan™ and BROMOScan™ use the same assay technology. For a more detailed description of this assay technology, see:

- Fabian, M.A. *et al.* A small molecule-kinase interaction map for clinical kinase inhibitors. *Nat. Biotechnol.* 23, 329-336 (2005).

To view kinase interactions for 38 well-known kinase inhibitors, see:

- Karaman, M.W. *et al.* A quantitative analysis of kinase inhibitor selectivity. *Nat. Biotechnol.* 26, 127-132 (2008).

For examples on how KINOMEScan can opportunistically identify unanticipated therapeutically-beneficial interactions, see:

- Carter, T.A. *et al.* Inhibition of drug-resistant mutants of ABL, KIT, and EGF receptor kinases. *Proc. Natl. Acad. Sci. USA.* 102, 11011-11016 (2005)

For more information on the Hill equation and the Levenberg-Marquardt algorithm, see:

- Hill, A. V. The possible effects of the aggregation of the molecules of hemoglobin on its dissociation curves. *J. Physiol. (Lond.)*. 40, iv-vii (1910).
- Levenberg, K. A method for the solution of certain non-linear problems in least squares. *Q. Appl. Math.* 2, 164-168 (1944).

Select publications are available at [www.discoverx.com](http://www.discoverx.com).

## SMA003-01-s-00001 Study Results

Table 1 - Matrix of Kds for SMA003-01-s-00001.

| Target      | PZ-2891 |
|-------------|---------|
| Gene Symbol | Kd (nM) |
| GRK3        | >30000  |
| SIK2        | >30000  |
| STK35       | >30000  |

### Kd Legend

|         |             |       |            |               |
|---------|-------------|-------|------------|---------------|
| x<100nM | 100nM≤x<1uM | x≥1uM | No Binding | Not Requested |
|---------|-------------|-------|------------|---------------|

## SMA003-01-s-00001 Curve Images

Table 2 - Curve Images for SMA003-01-s-00001. The amount of kinase measured by qPCR (Signal; y-axis) is plotted against the corresponding compound concentration in nM in log10 scale (x-axis). Data points marked with an "x" were not used for Kd determination.

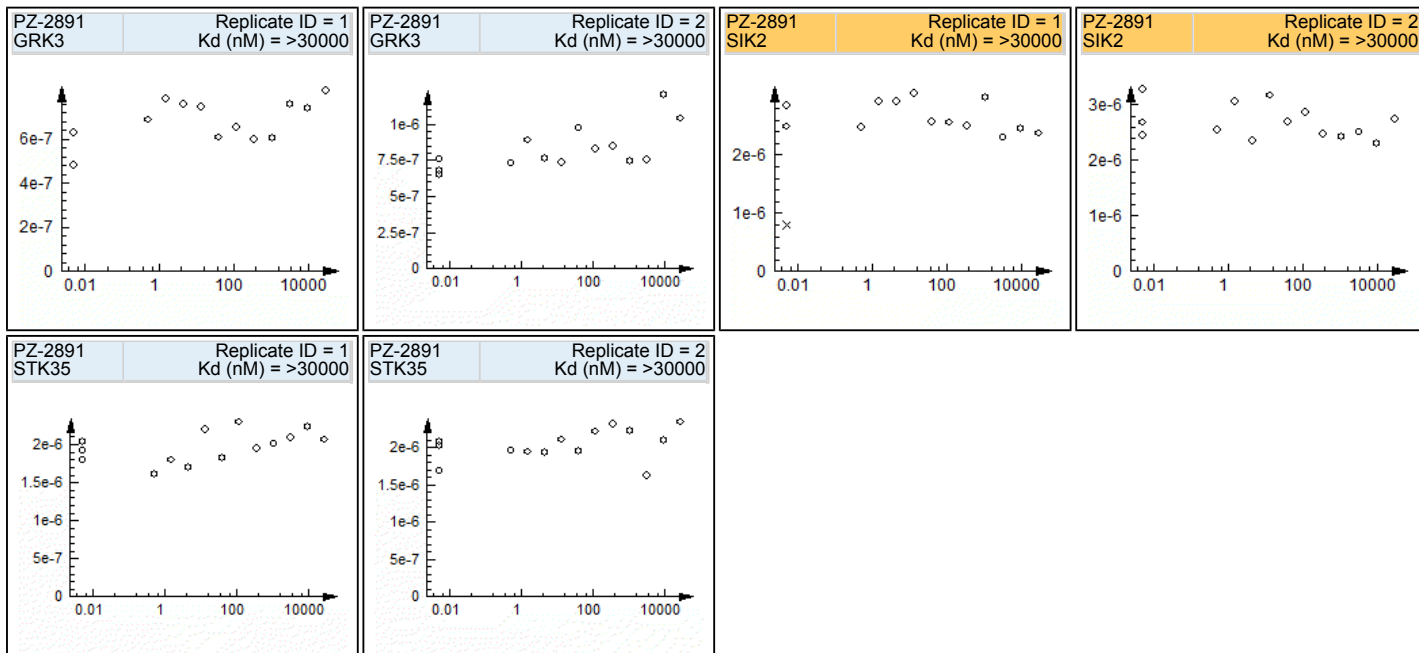

Supplement: 41467_2018_6703_MOESM3_ESM.pdf [file 41467_2018_6703_MOESM3_ESM.pdf]
