# Supplementary material for: A therapeutic approach to pantothenate kinase associated neurodegeneration
Source: PubMed Central journal article supplement (PMC6199309; doi:10.1038/s41467-018-06703-2), 2018-10-23
Supplement: 41467_2018_6703_MOESM4_ESM.pdf [file 41467_2018_6703_MOESM4_ESM.pdf]

| DiscoverX Gene Symbol | Assay Mode | PZ-2891<br>1 $\mu$ M |             |         | PZ-2891<br>10 $\mu$ M |             |         |
|-----------------------|------------|----------------------|-------------|---------|-----------------------|-------------|---------|
|                       |            | % Response           |             |         | % Response            |             |         |
|                       |            | Replicate 1          | Replicate 2 | Average | Replicate 1           | Replicate 2 | Average |
| <b>GPCRs</b>          |            |                      |             |         |                       |             |         |
| ADORA2A               | Agonist    | -14.5                | -16.2       | -15.4   | -19.5                 | -6.0        | -12.8   |
| ADORA2A               | Antagonist | -7.4                 | -13.6       | -10.5   | -6.4                  | 9.5         | 1.6     |
| ADRA1A                | Agonist    | -23.7                | -25.0       | -24.4   | -24.6                 | -24.5       | -24.6   |
| ADRA1A                | Antagonist | -9.2                 | -6.5        | -7.9    | 0.6                   | 12.4        | 6.5     |
| ADRA2A                | Agonist    | 10.5                 | 4.3         | 7.4     | 11.2                  | 3.8         | 7.5     |
| ADRA2A                | Antagonist | -4.9                 | -3.0        | -4.0    | -5.1                  | -7.8        | -6.5    |
| ADRB1                 | Agonist    | 1.1                  | 0.9         | 1.0     | 1.0                   | 0.1         | 0.6     |
| ADRB1                 | Antagonist | 7.6                  | 1.3         | 4.5     | 11.6                  | 8.6         | 10.1    |
| ADRB2                 | Agonist    | 0.7                  | 0.1         | 0.4     | 0.2                   | 0.2         | 0.2     |
| ADRB2                 | Antagonist | 8.4                  | 9.8         | 9.1     | 27.0                  | 23.8        | 25.4    |
| AVPR1A                | Agonist    | -0.8                 | -0.5        | -0.7    | -0.9                  | -1.2        | -1.1    |
| AVPR1A                | Antagonist | 0.8                  | 13.2        | 7.0     | 8.0                   | 29.0        | 18.5    |
| CCKAR                 | Agonist    | -5.2                 | -4.7        | -5.0    | -4.5                  | -4.6        | -4.6    |
| CCKAR                 | Antagonist | 0.9                  | 3.1         | 2.0     | 14.6                  | 8.6         | 11.6    |
| CHRM1                 | Agonist    | -0.4                 | -0.8        | -0.6    | -2.2                  | -1.9        | -2.1    |
| CHRM1                 | Antagonist | 1.3                  | 1.5         | 1.4     | 13.5                  | 13.1        | 13.3    |
| CHRM2                 | Agonist    | 9.8                  | 15.8        | 12.8    | 29.5                  | 40.6        | 35.1    |
| CHRM2                 | Antagonist | -7.4                 | -6.2        | -6.8    | -7.9                  | -13.3       | -10.6   |
| CHRM3                 | Agonist    | -1.3                 | -3.3        | -2.3    | -4.2                  | -2.7        | -3.5    |
| CHRM3                 | Antagonist | 1.6                  | 9.3         | 5.5     | 6.1                   | 12.3        | 9.2     |
| CNR1                  | Agonist    | 11.8                 | 15.5        | 13.7    | 42.3                  | 38.7        | 40.5    |
| CNR1                  | Antagonist | -2.9                 | -1.6        | -2.3    | -1.6                  | -5.6        | -3.6    |
| CNR2                  | Agonist    | 2.7                  | 13.8        | 8.3     | 10.3                  | 4.2         | 7.3     |
| CNR2                  | Antagonist | 1.4                  | -0.1        | 0.7     | -0.7                  | -1.8        | -1.3    |
| DRD1                  | Agonist    | 1.1                  | 0.6         | 0.9     | -0.6                  | 0.6         | 0.0     |
| DRD1                  | Antagonist | 32.9                 | 32.9        | 32.9    | 51.3                  | 53.3        | 52.3    |
| DRD2S                 | Agonist    | 8.9                  | 21.9        | 15.4    | 16.7                  | 21.6        | 19.2    |
| DRD2S                 | Antagonist | -0.8                 | -0.4        | -0.6    | -1.1                  | -1.2        | -1.2    |
| EDNRA                 | Agonist    | -2.7                 | -3.3        | -3.0    | -2.6                  | -2.5        | -2.6    |
| EDNRA                 | Antagonist | 2.9                  | 0.5         | 1.7     | 5.1                   | 7.9         | 6.5     |
| HRH1                  | Agonist    | -0.8                 | -0.6        | -0.7    | -0.9                  | -0.8        | -0.9    |
| HRH1                  | Antagonist | 5.6                  | 1.4         | 3.5     | 7.1                   | 3.0         | 5.1     |
| HRH2                  | Agonist    | 0.2                  | 0.0         | 0.1     | -0.5                  | -0.2        | -0.4    |
| HRH2                  | Antagonist | 1.5                  | 4.5         | 3.0     | 15.3                  | 18.8        | 17.1    |
| HTR1A                 | Agonist    | 14.8                 | 10.9        | 12.9    | 10.1                  | 11.4        | 10.8    |
| HTR1A                 | Antagonist | -0.7                 | -4.8        | -2.8    | -3.6                  | -3.0        | -3.3    |
| HTR1B                 | Agonist    | 9.5                  | 14.7        | 12.1    | 12.3                  | 15.0        | 13.7    |
| HTR1B                 | Antagonist | -0.5                 | -0.2        | -0.4    | -1.1                  | -0.8        | -1.0    |
| HTR2A                 | Agonist    | 3.0                  | -5.9        | -1.5    | -2.3                  | -1.8        | -2.1    |
| HTR2A                 | Antagonist | 1.6                  | 7.3         | 4.5     | 14.8                  | 14.4        | 14.6    |
| HTR2B                 | Agonist    | 8.0                  | 9.6         | 8.8     | 12.4                  | 7.4         | 9.9     |
| HTR2B                 | Antagonist | 17.4                 | 5.6         | 11.5    | 28.1                  | 47.5        | 37.8    |
| OPRD1                 | Agonist    | 14.7                 | 18.2        | 16.5    | 21.7                  | 17.5        | 19.6    |
| OPRD1                 | Antagonist | 0.0                  | 0.2         | 0.1     | 0.2                   | -1.3        | -0.6    |
| OPRK1                 | Agonist    | -1.9                 | -12.2       | -7.1    | 31.8                  | 33.6        | 32.7    |
| OPRK1                 | Antagonist | -1.3                 | 0.0         | -0.7    | -1.2                  | -0.3        | -0.8    |
| OPRM1                 | Agonist    | -1.1                 | 3.3         | 1.1     | 11.0                  | 14.1        | 12.6    |
| OPRM1                 | Antagonist | -0.7                 | -1.3        | -1.0    | -2.0                  | -1.8        | -1.9    |

| DiscoverX Gene Symbol            | Assay Mode | PZ-2891<br>1 $\mu$ M |             |         | PZ-2891<br>10 $\mu$ M |             |         |
|----------------------------------|------------|----------------------|-------------|---------|-----------------------|-------------|---------|
|                                  |            | % Response           |             |         | % Response            |             |         |
|                                  |            | Replicate 1          | Replicate 2 | Average | Replicate 1           | Replicate 2 | Average |
| <b>Nuclear Hormone Receptors</b> |            |                      |             |         |                       |             |         |
| AR                               | Agonist    | -0.5                 | -0.5        | -0.5    | -0.5                  | -0.5        | -0.5    |
| AR                               | Antagonist | 23.4                 | 17.1        | 20.3    | 15.9                  | -3.1        | 6.4     |
| GR                               | Agonist    | -0.9                 | 0.9         | 0.0     | 0.1                   | 0.5         | 0.3     |
| GR                               | Antagonist | 8.8                  | -11.1       | -1.2    | 4.9                   | -15.7       | -5.4    |
| <b>Transporters</b>              |            |                      |             |         |                       |             |         |
| DAT                              | Blocker    | -13.1                | 9.6         | -1.8    | -3.8                  | -7.1        | -5.5    |
| NET                              | Blocker    | 22.4                 | 18.6        | 20.5    | 20.1                  | 19.5        | 19.8    |
| SERT                             | Blocker    | 2.0                  | 1.0         | 1.5     | 3.2                   | 7.3         | 5.3     |
| <b>Ion Channels</b>              |            |                      |             |         |                       |             |         |
| CAV1.2                           | Blocker    | 0.6                  | -0.6        | 0.0     | 7.7                   | 5.9         | 6.8     |
| GABAA                            | Opener     | 1.7                  | 0.8         | 1.3     | 0.0                   | 1.1         | 0.6     |
| GABAA                            | Blocker    | -13.2                | -24.1       | -18.7   | -19.3                 | -25.7       | -22.5   |
| hERG                             | Blocker    | -36.2                | -1.4        | -18.8   | 7.2                   | -18.4       | -5.6    |
| HTR3A                            | Opener     | -10.4                | -18.0       | -14.2   | -2.3                  | -19.7       | -11.0   |
| HTR3A                            | Blocker    | -7.3                 | -21.6       | -14.5   | 4.8                   | 4.4         | 4.6     |
| NAV1.5                           | Blocker    | -22.1                | -16.8       | -19.5   | -19.6                 | -15.5       | -17.6   |
| <b>Non-Kinase Enzymes</b>        |            |                      |             |         |                       |             |         |
| ACE                              | Inhibitor  | 9.1                  | -0.1        | 4.5     | 22.2                  | 17.0        | 19.6    |
| COX1                             | Inhibitor  | -2.4                 | -7.1        | -4.7    | 13.6                  | 10.1        | 11.8    |
| COX2                             | Inhibitor  | 4.2                  | -1.3        | 1.5     | 23.4                  | 21.6        | 22.5    |
| MAOA                             | Inhibitor  | -0.8                 | -4.7        | -2.8    | 4.6                   | 2.6         | 3.6     |
| PDE3A                            | Inhibitor  | 16.6                 | 16.6        | 16.6    | 65.4                  | 66.8        | 66.1    |
| PDE4D2                           | Inhibitor  | 2.3                  | -2.3        | 0.0     | 0.0                   | 0.0         | 0.0     |
| <b>Kinases</b>                   |            |                      |             |         |                       |             |         |
| INSR                             | Inhibitor  | 10.7                 | 0.7         | 5.7     | -3.3                  | 16.0        | 6.4     |
| LCK                              | Inhibitor  | 1.8                  | -18.4       | -8.3    | -12.4                 | -3.6        | -8.0    |
| ROCK1                            | Inhibitor  | -12.3                | -8.5        | -10.4   | 8.5                   | 6.9         | 7.7     |
| VEGFR2                           | Inhibitor  | -8.2                 | 0.0         | -4.1    | 2.4                   | -14.1       | -5.8    |

| % Response Legend  |  |
|--------------------|--|
| x > 95%            |  |
| 95% $\leq$ x < 90% |  |
| 90% $\leq$ x < 85% |  |
| 85% $\leq$ x < 70% |  |
| x < 70%            |  |

**Supplementary Dataset 2. Activity of PZ-2891 as a modulator of 72 proteins commonly associated with off-target drug interactions.** The SAFETYscan was performed by DiscoverX using the indicated panel of GPCRs, ion channels, nuclear receptors, etc. at both 1 and 10  $\mu$ M PZ-2891.
